# Supplementary material for: Achieving high sensing sensitivity in a Dy3+ doped garnet phosphor toward optical thermometry
Source: Royal Society of Chemistry journal article supplement (doi:10.1039/d4tc03357d), 2024-01-01
Supplement: d4tc03357d1.pdf [file d4tc03357d1.pdf]

# Achieving high sensing sensitivity in Dy<sup>3+</sup> doped garnet phosphor toward optical thermometry

Shichang Long <sup>a,b</sup>, Minfeng Tian <sup>a</sup>, Dan Zhang <sup>b</sup>, Xixian Luo <sup>b</sup>, Wen Xu <sup>b</sup>, Ying Tian <sup>a\*</sup>, Shuangyu Xin <sup>b\*</sup>

<sup>a</sup> Department of applied physics, Dalian Maritime University, Dalian 116026, China.

<sup>b</sup> School of Physics and Materials Engineering, Dalian Minzu University, Dalian, Liaoning, 116600, China

\* E-mail address: tianying@dmlu.edu.cn (Ying Tian); xinshuangyu@dlmu.edu.cn (Shuangyu Xin)

## Experimental section

### Materials and Synthesis

A series of Ca<sub>2.5-x</sub>Hf<sub>2.5</sub>Ga<sub>3</sub>O<sub>12</sub>: xDy<sup>3+</sup> phosphors were synthesized by solid-state reaction at high temperature. The primary reagent used in this experiment were CaCO<sub>3</sub> (Macklin, 99.5%), HfO<sub>2</sub> (Macklin, 99.9%), Ga<sub>2</sub>O<sub>3</sub> (Macklin, 99.99%) and Dy<sub>2</sub>O<sub>3</sub> (Macklin, 99.9%), each of these components was assigned a weight proportional to their stoichiometric ratio. The weighed reagent were completely mixed and grounded thoroughly for 30 minutes in an agate mortar, and the final mixtures were heated up to 1400°C for 6 hours. Finally, the phosphors were successfully prepared after cooling to room temperature.

### Characterization

The powder X-ray diffraction (XRD) analysis was deployed to evaluate the phase purity and crystal structure using Cu K $\alpha$  radiation ( $\lambda = 1.54056 \text{ \AA}$ ) with settings of 40 kV and 30 mA. The morphology of sintered CHGO: Dy<sup>3+</sup> phosphors were characterized by JEM-2100F transmission electron microscopy (TEM). The photoluminescence excitation (PLE) and PL spectra, temperature emission spectra, and decay curves of the phosphors were measured by Edinburgh FLS-1000 fluorescence spectrophotometer equipped with an accessory for temperature-control and microsecond light source. In addition, the elemental composition was analyzed using energy dispersive X-ray spectroscopy (EDS). The diffuse reflectance spectra (DRS) were obtained by a Lambda

750 UV-Vis-NIR spectrophotometer. The electroluminescence (EL) spectra were measured using optical fiber spectrometer (HR-6XR300-10) measuring system under a drive current of 100-600 mA. The temperature variations of the phosphor-converted light-emitting diode (pc-LED) were captured using a FLUKE Ti32 thermal imaging camera as the driving currents were incrementally increased from 100 to 600 mA.

**Table S1** Optical thermometric parameters in Er<sup>3+</sup> doped materials

| Materials                                                                                            | $\lambda_{\text{ex}}$ (nm) | $S_r$ (% K <sup>-1</sup> ) | $S_a$ (% K <sup>-1</sup> ) | Ref |
|------------------------------------------------------------------------------------------------------|----------------------------|----------------------------|----------------------------|-----|
| BiPO <sub>4</sub> : Er <sup>3+</sup> /Yb <sup>3+</sup>                                               | 980                        | 0.0111@313 K               | 1.22@548 K                 | 1   |
| Ba <sub>2</sub> TiGe <sub>2</sub> O <sub>8</sub> : Er <sup>3+</sup> /Yb <sup>3+</sup>                | 980                        | 0.0107@333 K               | 0.59@573 K                 | 2   |
| LaBMoO <sub>6</sub> : Er <sup>3+</sup> /Yb <sup>3+</sup>                                             | 980                        | 1.1600@300 K               | /                          | 3   |
| Gd <sub>2</sub> O <sub>3</sub> : Er <sup>3+</sup> /Yb <sup>3+</sup>                                  | 980                        | 1.7200@301 K               | 1.27@574 K                 | 4   |
| NaGdF <sub>4</sub> : Er <sup>3+</sup> /Yb <sup>3+</sup>                                              | 980                        | 0.0119@303 K               | 0.40@563 K                 | 5   |
| BaMgF <sub>4</sub> : Er <sup>3+</sup> /Yb <sup>3+</sup>                                              | 980                        | 0.0131@323 K               | 0.83@583 K                 | 6   |
| LaF <sub>3</sub> : Er <sup>3+</sup> /Yb <sup>3+</sup>                                                | 980                        | 1.3000@150 K               | 3.50@400 K                 | 7   |
| Sc <sub>2</sub> (MoO <sub>4</sub> ) <sub>3</sub> : Er <sup>3+</sup> /Yb <sup>3+</sup>                | 980                        | 12.3000@298 K              | /                          | 8   |
| Sc <sub>2</sub> O <sub>3</sub> : Er <sup>3+</sup> /Yb <sup>3+</sup>                                  | 980                        | 0.5340@364 K               | 0.13@290 K                 | 9   |
| Ba <sub>5</sub> Gd <sub>8</sub> Zn <sub>4</sub> O <sub>21</sub> : Er <sup>3+</sup> /Yb <sup>3+</sup> | 980                        | 0.0169@260 K               | 0.32@490 K                 | 10  |

**Table S2** Crystallographic data of CHGO and CHGO: 0.01Dy<sup>3+</sup>

| Formula                       | CHGO        | CHGO: 0.01Dy <sup>3+</sup> |
|-------------------------------|-------------|----------------------------|
| Space group                   | Ia-3d (230) | Ia-3d (230)                |
| Crystal system                | Cubic       | Cubic                      |
| $\alpha = \beta = \gamma$ (°) | 90          | 90                         |
| $a = b = c$ (Å)               | 12.56653    | 12.53005                   |
| $V$ (Å <sup>3</sup> )         | 1984.477    | 1983.121                   |
| $R_p$ (%)                     | 9.79        | 11.15                      |
| $R_{wp}$ (%)                  | 7.12        | 9.18                       |
| $\chi^2$                      | 1.14        | 1.49                       |

**Table S3** The crystallographic atomic positions of CHGO: 0.01Dy<sup>3+</sup> based on the refinement

| Atom | x       | y       | z       | occup. | uiso   | Site |
|------|---------|---------|---------|--------|--------|------|
| O    | 0.09160 | 0.19228 | 0.27493 | 1.000  | 0.014  | 96h  |
| Ga   | 0.37500 | 0.00000 | 0.25000 | 1.000  | -0.027 | 24d  |
| Ca   | 0.12500 | 0.00000 | 0.25000 | 0.825  | -0.025 | 24c  |
| Hf1  | 0.12500 | 0.00000 | 0.25000 | 0.167  | -0.025 | 24c  |
| Hf2  | 0.00000 | 0.00000 | 0.00000 | 1.000  | -0.032 | 16a  |
| Dy   | 0.12500 | 0.00000 | 0.25000 | 0.008  | -0.025 | 24c  |

**Table S4** Maximum S<sub>a</sub> and S<sub>r</sub> in CHGO: 0.01Dy<sup>3+</sup> phosphors.

| Intensity ratio scheme             | Temperature | S <sub>a</sub> (%K <sup>-1</sup> ) | S <sub>r</sub> (%K <sup>-1</sup> ) |
|------------------------------------|-------------|------------------------------------|------------------------------------|
| I <sub>457</sub> /I <sub>483</sub> | 298-523K    | 0.10@523 K                         | 2.08@298 K                         |
| I <sub>457</sub> /I <sub>495</sub> | 298-523K    | 0.13@523 K                         | 2.12@298 K                         |
| I <sub>457</sub> /I <sub>582</sub> | 298-523K    | 0.09@523 K                         | 2.07@298 K                         |
| I <sub>457</sub> /I <sub>675</sub> | 298-523K    | 2.51@523 K                         | 1.55@298 K                         |

**Table S5.** Comparison of Dy<sup>3+</sup> doped materials as luminescent ratiometric thermometers.

| Host: Dy <sup>3+</sup>                                                              | Temperature range | S <sub>r-max</sub> (%K <sup>-1</sup> ) | S <sub>a-max</sub> (%K <sup>-1</sup> ) | Ref.      |
|-------------------------------------------------------------------------------------|-------------------|----------------------------------------|----------------------------------------|-----------|
| Li <sub>3</sub> Y <sub>3</sub> Te <sub>2</sub> O <sub>12</sub> : Dy <sup>3+</sup>   | 80-300 K          | 1.20@80 K                              | 2.000@80 K                             | 11        |
| GdVO <sub>4</sub> : Dy <sup>3+</sup>                                                | 300-473 K         | 2.00@300 K                             | 0.399@473 K                            | 12        |
| LaF <sub>3</sub> : Dy <sup>3+</sup>                                                 | 298-523 K         | 2.02@298 K                             | 0.020@523 K                            | 13        |
| YVO <sub>4</sub> : Dy <sup>3+</sup>                                                 | 298-673 K         | 1.66 @298 K                            | 0.033@673 K                            | 14        |
| Sr <sub>2</sub> NaMg <sub>2</sub> V <sub>3</sub> O <sub>12</sub> : Dy <sup>3+</sup> | 250-500 K         | 1.90 @380 K                            | /                                      | 15        |
| LiNbO <sub>3</sub> : Dy <sup>3+</sup>                                               | 295-775 K         | 1.89 @298 K                            | 0.060@700 K                            | 16        |
| CHGO: Dy <sup>3+</sup>                                                              | 298-523 K         | 2.12@298 K                             | 2.510@523 K                            | This work |

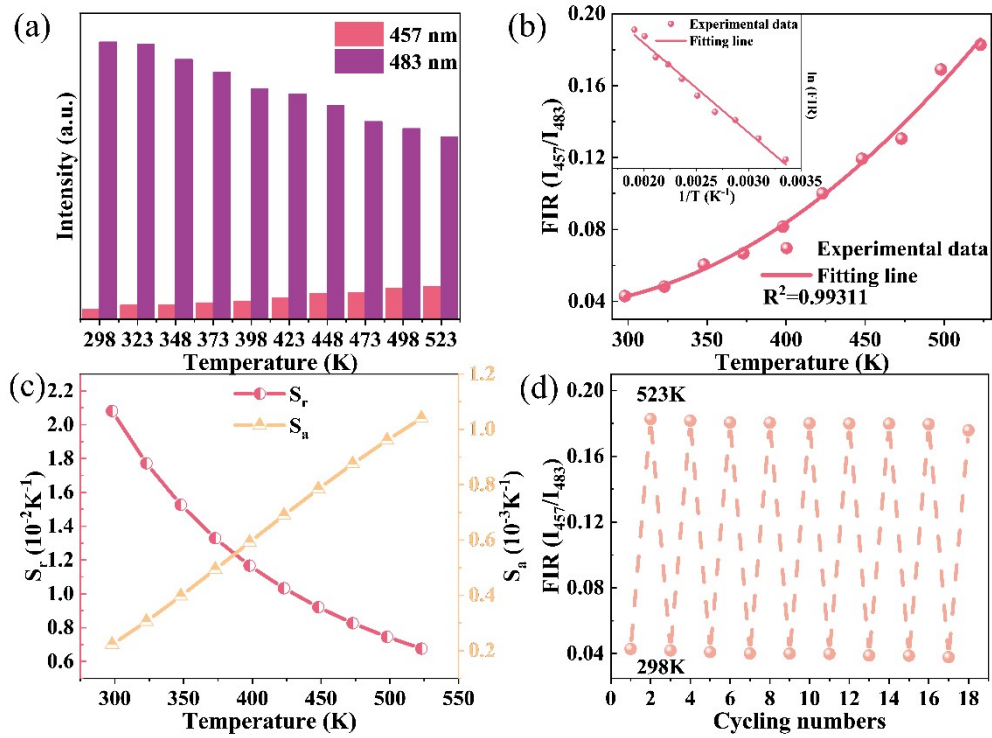

Figure S1a) The integrated fluorescence intensities of the PL peaks at 457 and 483 nm at different temperatures; b) The fitting curve of FIR ( $I_{457}/I_{483}$ ) values at various temperatures. The inset shows the correspondence plot of  $\ln(\text{FIR})$  versus  $1/T$ .; c) The fitting curves of the absolute sensitivity ( $S_a$ ) and relative sensitivity ( $S_r$ ) values at different temperatures; d) The repeatability of FIR of CHGO: 0.01Dy<sup>3+</sup>.

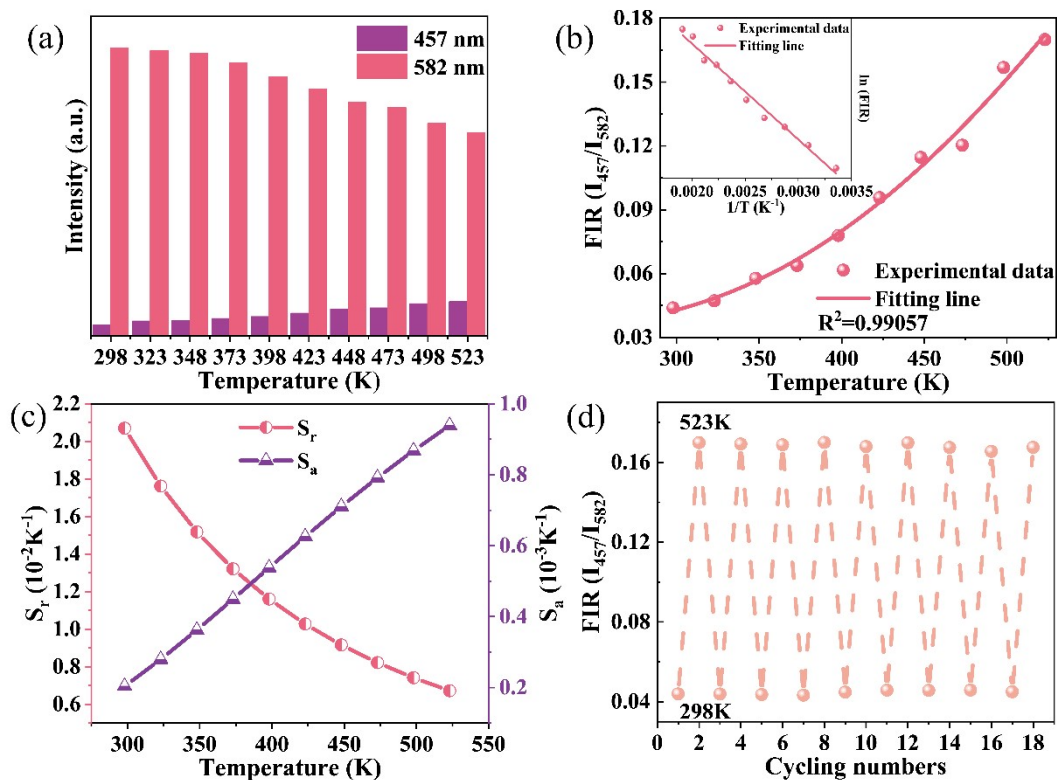

Figure S2a) The integrated fluorescence intensities of the PL peaks at 457 and 582 nm at different temperatures; b) The fitting curve of FIR ( $I_{457}/I_{582}$ ) values at various temperatures. The inset shows the correspondence plot of  $\ln(\text{FIR})$  versus  $1/T$ .; c) The fitting curves of the absolute sensitivity ( $S_a$ ) and relative sensitivity ( $S_r$ ) values at different temperatures; d) The repeatability of FIR of CHGO: 0.01Dy<sup>3+</sup>.

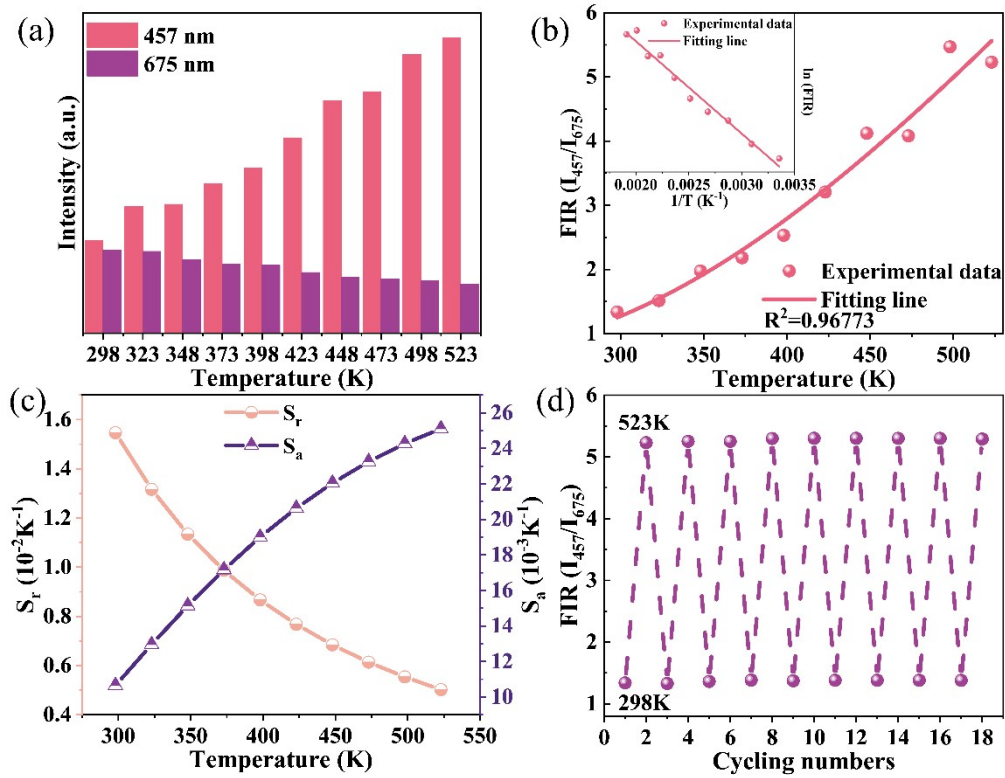

Figure S3a) The integrated fluorescence intensities of the PL peaks at 457 and 675 nm at different temperatures; b) The fitting curve of FIR ( $I_{457}/I_{675}$ ) values at various temperatures. The inset shows the correspondence plot of  $\ln(\text{FIR})$  versus  $1/T$ .; c) The fitting curves of the absolute sensitivity ( $S_a$ ) and relative sensitivity ( $S_r$ ) values at different temperatures; d) The repeatability of FIR of CHGO: 0.01Dy<sup>3+</sup>.

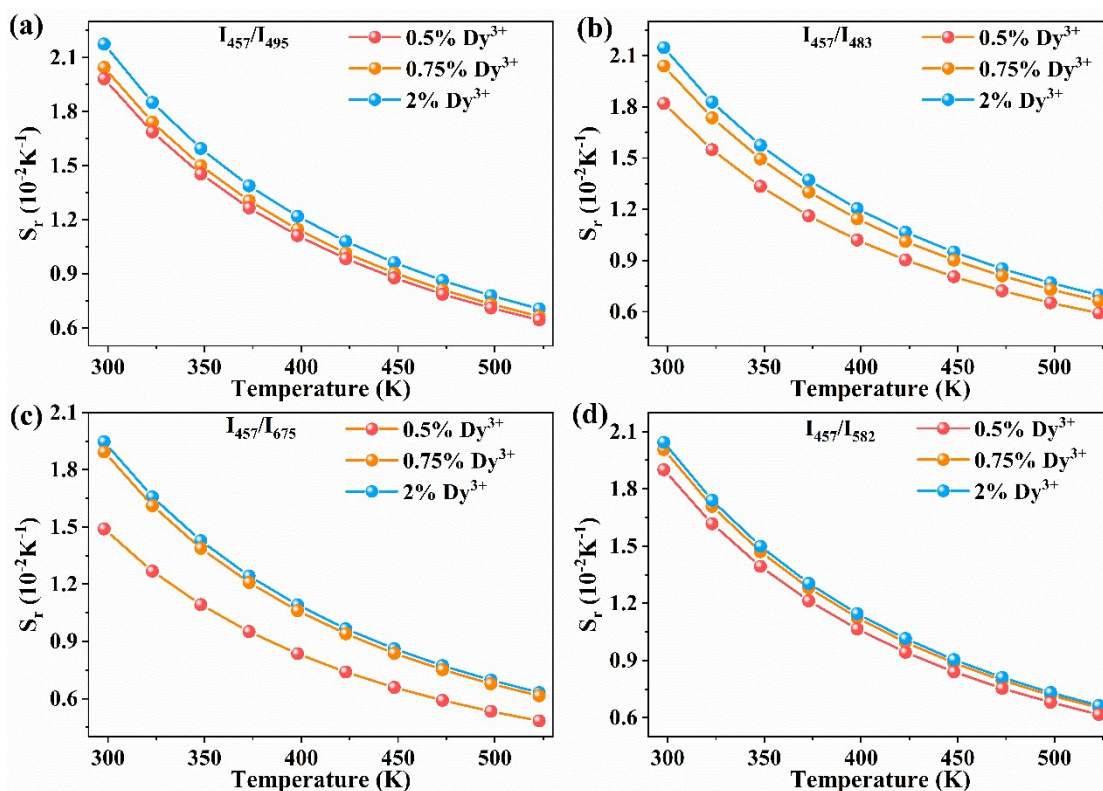

Figure S4 The  $S_T$  values of the CHGO:  $x\text{Dy}^{3+}$  ( $x = 0.5\%$ ,  $0.75\%$  and  $2\%$ ) phosphors for  $I_{457}/I_{495}$  (a),  $I_{457}/I_{483}$  (b),  $I_{457}/I_{675}$  (c) and  $I_{457}/I_{582}$  (d).

## References

1. N. Wang, Z. Fu, Y. Wei and T. Sheng, Investigation for the upconversion luminescence and temperature sensing mechanism based on  $\text{BiPO}_4: \text{Yb}^{3+}, \text{RE}^{3+}$  ( $\text{RE}^{3+} = \text{Ho}^{3+}, \text{Er}^{3+}$  and  $\text{Tm}^{3+}$ ), *J. Alloys. Compd.*, 2019, **772**, 371-380.
2. B. Hou, M. Jia, P. Li, G. Liu, Z. Sun and Z. Fu, Multifunctional optical thermometry based on the rare-earth-ions-doped up-/down-conversion  $\text{Ba}_2\text{TiGe}_2\text{O}_8: \text{Ln}$  ( $\text{Ln} = \text{Eu}^{3+}/\text{Er}^{3+}/\text{Ho}^{3+}/\text{Yb}^{3+}$ ) phosphors, *Inorg. Chem*, 2019, **58**, 7939-7946.
3. X. Li, B. Bao, X. He, G. Wang, Y. Huang, L. Li and Y. Yu, Optical temperature sensing with an  $\text{Er}^{3+}, \text{Yb}^{3+}$  co-doped  $\text{LaBMoO}_6$  single crystal, *J. Mater. Chem. C*, 2023, **11**, 2494-2504.
4. Z. Li, Q. Han, T. Yan, Z. Huang, Y. Song, Y. Wang and X. Zhang, Up-conversion luminescence and optical temperature sensing of  $\text{Er}^{3+}, \text{Yb}^{3+}$  co-doped  $\text{Gd}_2\text{O}_3$  phosphors with different  $\text{F}^-/\text{Ln}^{3+}$ , *J. Alloys. Compd*, 2022, **904**, 164009.

5. D. Chen, S. Liu, X. Li, Z. Wan and S. Li, Gd-based oxyfluoride glass ceramics: phase transformation, optical spectroscopy and upconverting temperature sensing, *J. Eur. Ceram. Soc.*, 2017, **37**, 4083-4094.
6. B. P. Kore, A. Kumar, L. Erasmus, R. E. Kroon, J. J. Terblans, S. J. Dhoble and H. C. Swart, Energy transfer mechanisms and optical thermometry of BaMgF<sub>4</sub>: Yb<sup>3+</sup>, Er<sup>3+</sup> phosphor, *Inorg. Chem.*, 2018, **57**, 288-299.
7. H. Zhang, X. Dong, L. Jiang, Y. Yang, X. Cheng and H. Zhao, Comparative analysis of upconversion emission of LaF<sub>3</sub>: Er/Yb and LaOF: Er/Yb for temperature sensing, *J. Mol. Struct.*, 2020, **1206**, 127665.
8. J. Liao, M. Wang, F. Lin, Z. Han, B. Fu, D. Tu, X. Chen, B. Qiu and H.-R. Wen, Thermally boosted upconversion and downshifting luminescence in Sc<sub>2</sub>(MoO<sub>4</sub>)<sub>3</sub>: Yb/Er with two-dimensional negative thermal expansion, *Nat. Commun.*, 2022, **13**, 2090.
9. H. L. Zhou, K. S. Zhu, J. Wang, L. H. Ye, J. X. Zhang and L. G. Wang, Effects of Er<sup>3+</sup> and Yb<sup>3+</sup> concentrations on upconversion luminescence and thermal sensing characteristics of Sc<sub>2</sub>O<sub>3</sub>: Er<sup>3+</sup>/Yb<sup>3+</sup> phosphors, *Ceram. Int.*, 2024, **50**, 1947-1955.
10. H. Suo, C. Guo and T. Li, Broad-scope thermometry based on dual-color modulation upconversion phosphor Ba<sub>5</sub>Gd<sub>8</sub>Zn<sub>4</sub>O<sub>21</sub>: Er<sup>3+</sup>/Yb<sup>3+</sup>, *J. Phys. Chem. C*, 2016, **120**, 2914-2924.
11. A. Bindhu, J. I. Naseemabeevi and S. Ganesanpotti, Insights into the crystal structure and photophysical response of Dy<sup>3+</sup> doped Li<sub>3</sub>Y<sub>3</sub>Te<sub>2</sub>O<sub>12</sub> for ratiometric temperature sensing, *J. Sci. Adv. Mater. Dev.*, 2022, **7**, 100444.
12. Z. Antic, M. D. Dramicanin, K. Prashanthi, D. Jovanovic, S. Kuzman and T. Thundat, Pulsed laser deposited dysprosium-doped gadolinium-vanadate thin films for noncontact, self-referencing luminescence thermometry, *Adv. Mater.*, 2016, **28**, 7745-7752.
13. Y. Y. Bu, S. J. Cheng, X. F. Wang and X. H. Yan, Optical thermometry based on luminescence behavior of Dy<sup>3+</sup>-doped transparent LaF<sub>3</sub> glass ceramics *Appl. Phys. A*, 2015, **121**, 1433-1434.
14. I. Kolesnikov, A. Kalinichev, M. Kurochkin, E. Y. Kolesnikov and E. Lähderanta, Structural, luminescence and thermometric properties of nanocrystalline YVO<sub>4</sub>: Dy<sup>3+</sup> temperature and concentration series, *Sci Rep.*, 2019, **9**, 2043.



- 15.A. Bindhu, J. I. Naseemabeevi and S. Ganesanpotti, Augmenting cyan emission in vanadate garnets via Dy<sup>3+</sup> activation for light emitting devices and multi-mode optical thermometry, *Dalton Trans.*, 2023, **52**, 11705-11715.
- 16.R. Lisiecki, B. Macalik, R. Kowalski, J. Komar and W. Ryba-Romanowski, Effect of temperature on luminescence of LiNbO<sub>3</sub> crystals single-doped with Sm<sup>3+</sup>, Tb<sup>3+</sup>, or Dy<sup>3+</sup> Ions, *Crystals*, 2020, **10**, 1034.
